# Supplementary material for: Public Health Interventions and Overdose-Related Outcomes Among Persons With Opioid Use Disorder
Source: PubMed Central journal article supplement (PMC10993074; doi:10.1001/jamanetworkopen.2024.4617), 2024-04-03
Supplement: jamanetwopen-e244617-s002.pdf [file jamanetwopen-e244617-s002.pdf]

## Data Sharing Statement

Nataraj. Public Health Interventions and Overdose-Related Outcomes Among Persons With Opioid Use Disorder. *JAMA Netw Open*. Published April 03, 2024.

doi:10.1001/jamanetworkopen.2024.4617

### Data

**Data available:** Yes

**Data types:** Data (not involving human participants)

**How to access data:** All data used in the model are made available in the manuscript and accompanying supplementary content.

**When available:** With publication

### Supporting Documents

**Document types:** None

### Additional Information

**Who can access the data:** Researchers whose proposed use of the data has been approved

**Types of analyses:** For research purpose

**Mechanisms of data availability:** All data are made available in the manuscript and supplementary material
